# Supplementary material for: Autoactive CNGC15 enhances root endosymbiosis in legume and wheat
Source: Springer Nature journal article supplement (doi:10.1038/s41586-024-08424-7), 2025-01-15
Supplement: MOESM1 [file 41586_2024_8424_MOESM1_ESM.pdf]

---

**Supplementary information**

---

**Autoactive CNGC15 enhances root endosymbiosis in legume and wheat**

---

In the format provided by the  
authors and unedited

## Transmembrane domain S1

|              |                       |        |     |
|--------------|-----------------------|--------|-----|
| MtCNGC15a    | PRINLWNKIFLAACLISLFVD | PLFFYL | 103 |
| MtCNGC15c    | QLIHRWNKIFLVACLVS     | PLFFYL | 109 |
| MtCNGC15b    | QTIHQWNKIFLVACLISLFVD | PLFFYL | 91  |
| GmCNGC15a    | HRVNTWNKIFLAACLLS     | PLFFYL | 103 |
| GmCNGC15b    | HRVNTWNKIFLAACLLS     | PLFFYL | 107 |
| GmCNGC15d    | QTIHRWNKIFLVACLVS     | PLFFYL | 109 |
| GmCNGC15e    | QTIHRWNKIFLVACLAS     | PLFFYL | 109 |
| GmCNGC15c    | QTIHRWNKILLVACLVS     | PLFFYL | 106 |
| SlCNGC15a    | RLINIWNKCFLIASLTS     | PLFFYL | 109 |
| SlCNGC15b    | HVIRRWNKFFLVSCLV      | PLFFYL | 111 |
| SlCNGC15c    | PTVRRWNKILLVACLIG     | PLFFYL | 111 |
| TaCNGC15a-A1 | QVVRWHKVFFLAACLAS     | PLFLYL | 116 |
| TaCNGC15a-B1 | QVIHRWHKVFLAACLAS     | PLFLYL | 116 |
| TaCNGC15a-D1 | QVIHRWHKVFLAACLAS     | PLFLYL | 116 |
| TaCNGC15b-A1 | RVIHLWNKIFLTACLLS     | PLFLYL | 127 |
| TaCNGC15b-B1 | RVIHLWNKIFLTACLLS     | PLFLYL | 126 |
| TaCNGC15b-D1 | RVIHLWNKIFLTACLLS     | PLFLYL | 128 |
| OsCNGC15     | QLIHLWSKIFLAACLAS     | PLFLYL | 120 |
| ZmCNGC15     | QLIHLWNKIFLSACLLS     | PLFLYL | 119 |
| A.hCNGC15a   | PRVNRWNKIFLVACLIS     | PLFFYL | 98  |
| A.hCNGC15c   | QAIHRWNKIFLVASLV      | PLFFYL | 67  |
| A.hCNGC15b   | QTIHRWNKIFLVACLVS     | PLFFYL | 88  |
| AtCNGC15     | QTIHRWNKIFLIACLVS     | PLFFYL | 100 |
| AtCNGC2      | KRVQRWNRALLLARGMA     | PLFFYA | 145 |
| MtCNGC2      | KRVQLSNRALLLARGVA     | PLFFYA | 141 |
| AtCNGC4      | KWVREWNKVFLLVCA       | PLFLYT | 111 |
| MtCNGC4a     | KWAEWNRVFLVLCAMG      | PLFFYA | 95  |
| MtCNGC4b     | KWVQEWNRVFLVCAAG      | PLFFYA | 94  |
| MtCNGCIVaE   | KVVHLWNKFLAIICFVA     | PLFLFS | 36  |
| AtCNGC19     | KFVQVWTRVLAFFSSL      | PLFFFL | 120 |
| AtCNGC20     | KEVQWTWKFFALSCLLA     | PLFFFL | 112 |
| MtCNGCIVaA   | KLVBQWNKFFAICCLVA     | PLFFFL | 124 |
| MtCNGCIVaD   | KVVQQWNTIFAISCSVA     | PLFFFL | 59  |
| MtCNGCIVaF   | KLVBQWNKFLAIFCMLA     | PLFLFL | 65  |
| MtCNGCIVaB   | KIVQQWNKFLAIFCLLA     | PLFFFL | 100 |
| MtCNGCIVaC   | KVVQQWNKFLAIFCIVA     | PLFFFL | 109 |
| AtCNGC14     | DAVLQWNRVFLFWCLVA     | PLFFFL | 104 |
| AtCNGC17     | EIVLKWNWVFIVSCMVA     | PLFFFL | 103 |
| MtCNGC14     | DIFLEWKRAFLCSCILS     | PLFFYL | 105 |
| MtCNGC17     | QIVLKWNRLFIVSCLLA     | PLFFYL | 75  |
| AtCNGC16     | DLITRWNHIFLITCLLA     | PLFFYL | 76  |
| MtCNGC16     | PFVAKWNVTFLYACLFA     | PLFFYL | 67  |
| AtCNGC18     | NIVTYWNHVFILITSILA    | PLFFYL | 71  |
| MtCNGC18     | ELVAYWNKVFLVTSLLA     | PLFFFL | 75  |
| AtCNGC7      | KTLVWNRLFVISCILAVS    | PLFFYL | 93  |
| AtCNGC8      | KTLVWNRMFVISCILAVS    | PLFFYL | 129 |
| AtCNGC6      | KFLLLCNKLFFVASCILA    | PLFLYL | 135 |
| AtCNGC9      | KFLLLCNKLFFVASCILA    | PLFLYL | 109 |
| AtCNGC5      | KFLLLCNKLFFVASCILS    | PLFFYL | 120 |
| MtCNGCII     | KFLLLCNKLFFVASCILS    | PLFFYL | 131 |
| AtCNGC10     | SFLQWNKIFLFACVVALA    | PLFFYL | 100 |
| AtCNGC13     | SFLQWNKIFLFASVIALA    | PLFFYL | 100 |
| AtCNGC3      | SYLQSWNKIFLLSVVALA    | PLFFYL | 104 |
| AtCNGC11     | KTLENWRKTVLLACVVALA   | PLFLFI | 61  |
| AtCNGC12     | KTLENWRKTVLLACVVALA   | PLFLFI | 61  |
| AtCNGC1      | PFLQRWNKIFVLACIAV     | PLFFYL | 116 |
| MtCNGC1a     | TFLQKWNKIFVLLCVIAV    | PLFFYL | 115 |
| MtCNGC1b     | PFLQKWNKIFVLSCLIAV    | PLFFYL | 113 |
| MtCNGC1a     | PLLQKWNKIFVITCVMAS    | PLFFYL | 93  |
| MtCNGC1b     | PMLQKWNKIFVITCVLA     | PLFFYL | 107 |
| . . . . .    |                       |        |     |

**SI Fig. 1| Sequence conservation of S1 amino acid sequence of CNGC15.**

Protein sequence alignment of the S1 transmembrane domain of CNGC15 from *Medicago truncatula* (Mt), *Arabidopsis thaliana* (At), *Arachis hypogaea* (A.h), *Glycine max* (Gm), *Oryza sativa* (Os), *Solanum lycopersicum* (Sl), *Triticum aestivum* (Ta) and *Zea mays* (Zm). Highly conserved Proline residue mutated in CNGC15<sup>GO</sup> is highlighted in yellow.

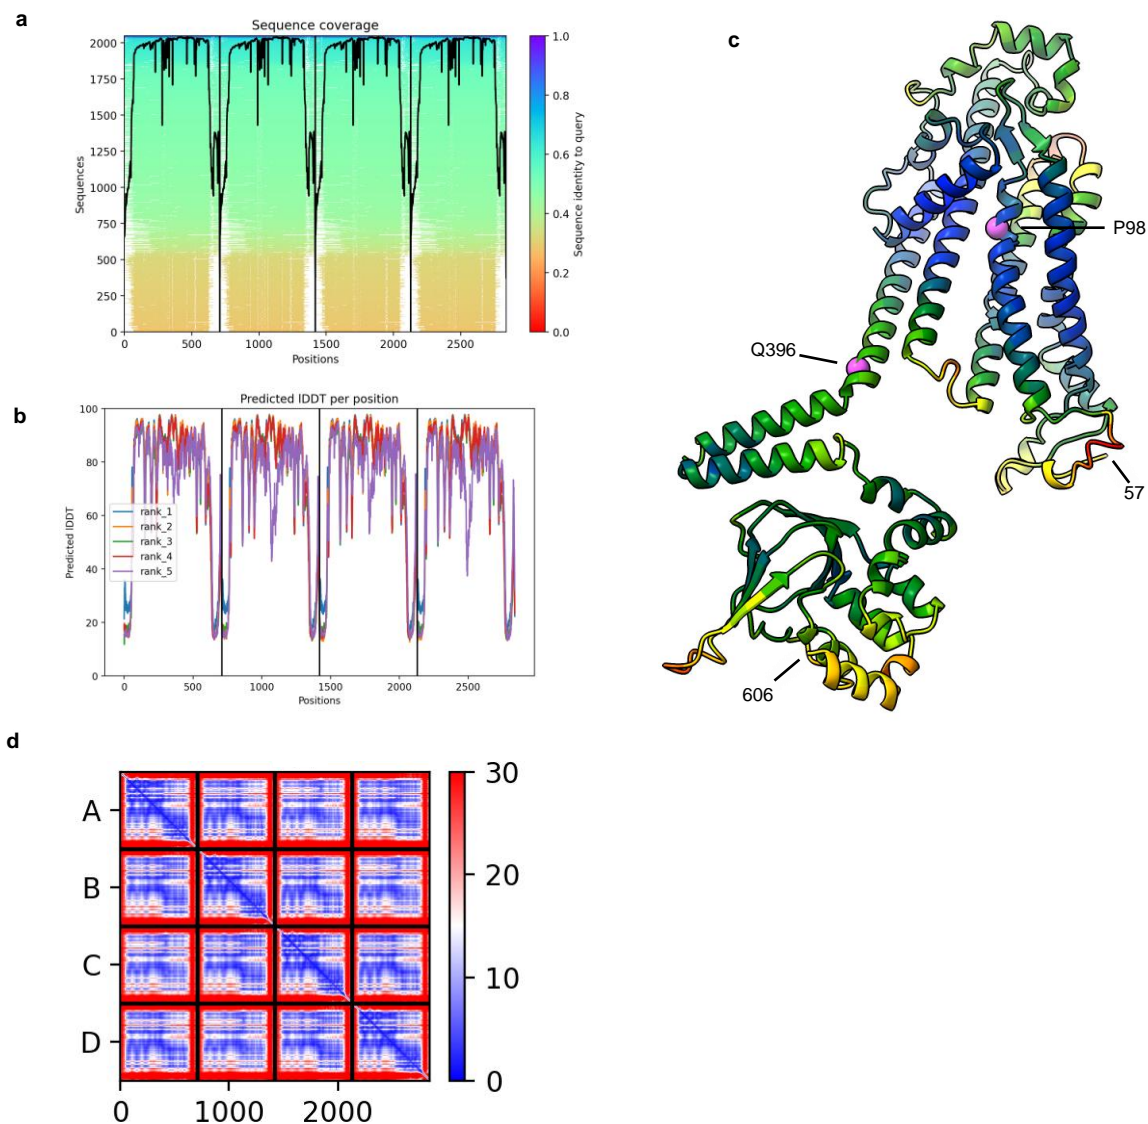

**SI Fig. 2| Confidence metrics of CNGC15a homotetramer.**

**a**, Sequence identity plot showing good coverage and depth for the multiple sequence alignment against the MtCNGC15a sequence (the alignment is shown four times, once for each subunit). **b**, Plots of the predicted local distance difference test score (pLDDT) for the five independent tetramer models, which are overlaid (see inset colour scheme). The scores for each subunit are shown in separate panels. pLDDT values exceeding 70 are achieved across all the five models, except at the termini and in a few surface loops. **c**, AlphaFold2 model of a single subunit taken from the top ranked model coloured according to pLDDT score, where residues with values of less than 50 are coloured red; residues with values in the range 50-100 are shown in rainbow colouration from red through to blue, with blue indicating the highest quality. Residues at the poorly predicted termini were omitted (i.e. residues 1-56 and 607-710). Magenta spheres indicate the position of Pro98 positioned in S1 and the channel gating residues Gln396. **d**, Visualization of Predicted Aligned Errors (PAE) for the top ranked model; the off-diagonal blue blocks indicate high confidence in the relative placement of the subunits within the tetramer. A to D indicate the four units of MtCNGC15. The x-axis numbering in **a**, **b** and **d** indicates the cumulative residue count for the tetramer (total = 4 x 710 = 2840 residues).

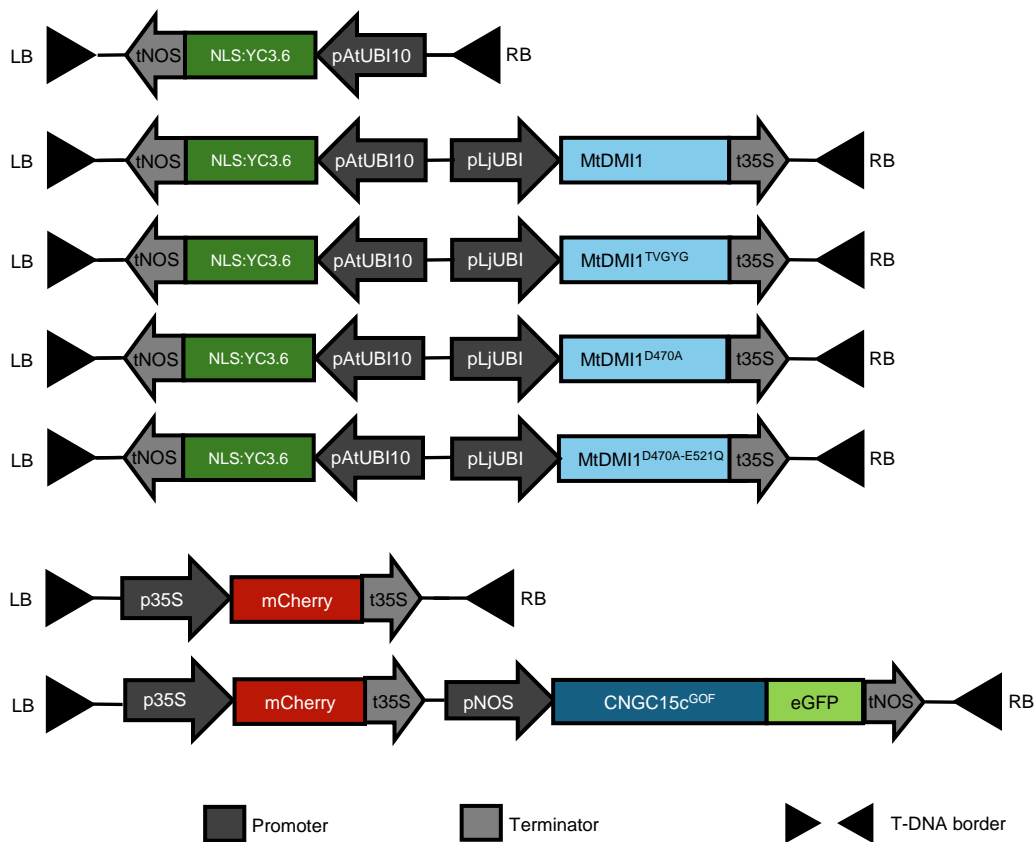

**SI Fig. 3| GoldenGate constructs generated in this study.**
